# Supplementary material
Source: Springer Nature journal article supplement (https://www.springermedizin.de/resource/supplementary/12877_2009_172_MOESM1_ESM.pdf/9441326)

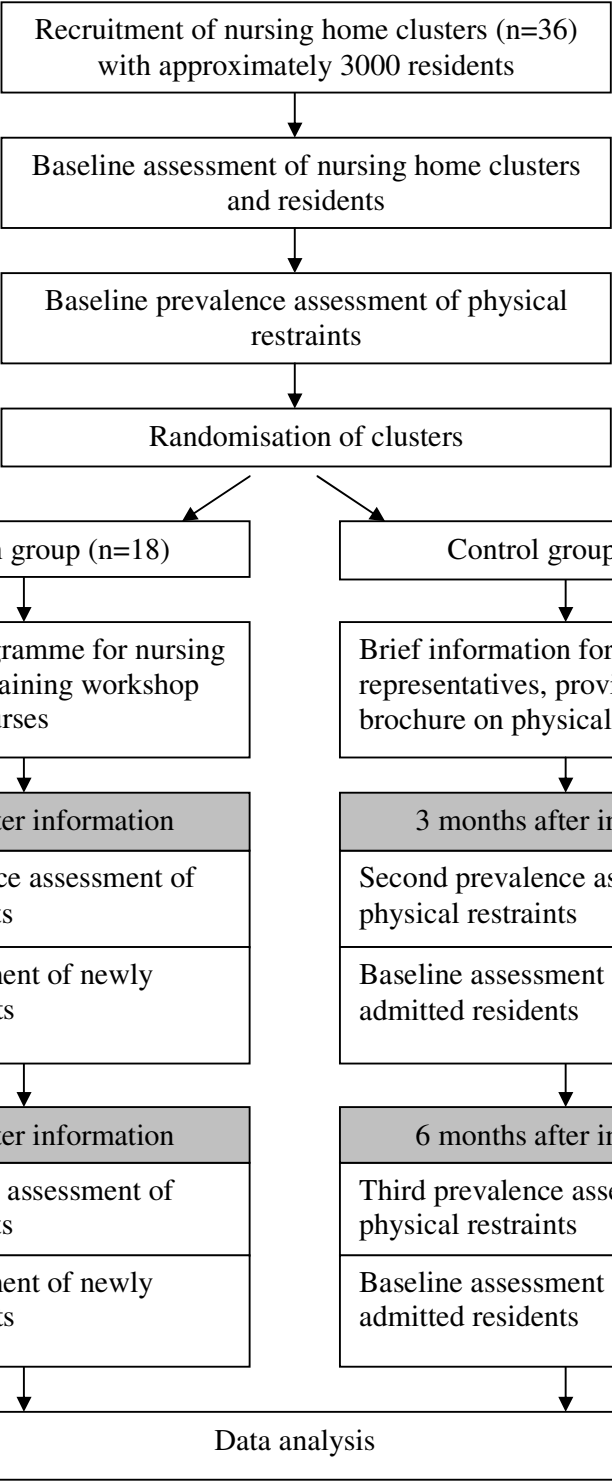

Supplement: MOESM1 [file 9441326]
